# Supplementary material
Source: PubMed Central journal article supplement (PMC6212312)
Supplement: NIHMS987025-supplement-Supp_AppendixS1.pdf [file NIHMS987025-supplement-Supp_AppendixS1.pdf]

**Supporting Information.** Disease where you dine: Plant species and floral traits associated with pathogen transmission in bumble bees. Lynn S. Adler, Kristen M. Michaud, Stephen P. Ellner, Scott H. McArt, Philip C. Stevenson, and Rebecca E. Irwin. *Ecology*. 2018.

**Appendix S1. Plant source and propagation methods**

In general, plants were grown from seed, purchased from nurseries and transplanted to the field site, or collected from wild field sites. All dates are in 2014. In all cases we used Fafard Growing Mix #2 (Fafard, Inc., Anderson, SC, USA) except that sunflower (*Helianthus annuus* Incredible) and *Echium vulgare* were germinated in Fafard Super-fine germinating plug mix. Plants grown from seed were germinated in a propagation room with natural light (24°C day & night, with misting from dawn to dusk every 12 minutes for 15 seconds) and then transferred to a greenhouse with natural light (26.7°C day and 18.3°C night; late July and August : 22.8°C day and 19.4°C night) before transplanting to the field site.

Table S1. Plant source and propagation methods.

| <b>Species</b>                                                     | <b>Abbreviation</b> | <b>Common name</b> | <b>Source</b>                                                 | <b>Propagation Method</b>                                    | <b>Date in field</b> | <b>Sample size for trait measures</b> |
|--------------------------------------------------------------------|---------------------|--------------------|---------------------------------------------------------------|--------------------------------------------------------------|----------------------|---------------------------------------|
| <i>Antirrhinum majus</i><br>'Twinny Peach' and<br>'La Belle White' | ANT                 | snapdragon         | Andrews<br>Greenhouse;<br>Hadley Garden<br>Center             | purchased from nurseries and<br>directly transplanted        | June 4               | 25                                    |
| <i>Asclepias incarnata</i>                                         | ASC                 | milkweed           | Collected from<br>the field:<br>42°23'0.04"N<br>72°32'16.93"W | inflorescences were bagged<br>and collected from field sites | N/A                  | 30                                    |
| <i>Digitalis purpurea</i> ;<br>'Foxy' and lavender<br>'Camelot'    | DIG                 | foxglove           | Andrews<br>Greenhouse;                                        | purchased from nurseries and<br>directly transplanted        | June 4 and<br>9      | 22                                    |

|                                       |     |                    |                                                                  |                                                                                             |                    |    |
|---------------------------------------|-----|--------------------|------------------------------------------------------------------|---------------------------------------------------------------------------------------------|--------------------|----|
|                                       |     |                    | Lowes Home Improvement                                           |                                                                                             |                    |    |
| <i>Eupatorium perfoliatum</i>         | EUP | common boneset     | New England Wetland Plants                                       | purchased from nursery and directly transplanted                                            | June 4             | 30 |
| <i>Helianthus annuus</i> 'Incredible' | HEL | sunflower          | Burpee, from Home Depot                                          | plants seeds in 50-plug trays on June 3, transplanted to 1 gal pots for the field           | June 16            | 31 |
| <i>Impatiens capensis</i>             | IMP | jewelweed          | Collected from the field:<br>42°35'18.3"N<br>72°52'39.5" W       | Inflorescences were bagged and collected directly from the field for use in trials          | N/A                | 30 |
| <i>Linaria vulgaris</i>               | LIN | butter-and-eggs    | seeds collected from the field:<br>42°17'3.79"N<br>72°31'55.78"W | seeds planted directly in pots using native soil buried at the field site to prevent spread | June 20            | 30 |
| <i>Lobelia siphilitica</i>            | LOB | blue lobelia       | New England Wetland Plants; Ion Exchange                         | purchased from nurseries; planted in 4" pots in greenhouse or else directly transplanted    | June 4             | 32 |
| <i>Lythrum salicaria</i>              | LYT | purple loosestrife | collected from the field:<br>42°38'53.8" N,<br>72°53'76.5" W     | dug from the field and transplanted, plants were buried in 5 gallon pots to prevent spread  | June 12            | 30 |
| <i>Monarda didyma</i> 'Pink Lace'     | MON | beebalm            | Pioneer Gardens                                                  | purchased from nursery and directly transplanted                                            | June 10, 11 and 12 | 23 |
| <i>Penstemon digitalis</i>            | PEN | penstemon          | New England Wetland Plants; Prairie Moon Nursery                 | purchased from nurseries; planted in 4" pots in greenhouse or directly transplanted         | June 4             | 38 |

|                            |      |                        |                                                                                                                                                                 |                                                                                                                        |                    |    |
|----------------------------|------|------------------------|-----------------------------------------------------------------------------------------------------------------------------------------------------------------|------------------------------------------------------------------------------------------------------------------------|--------------------|----|
| <i>Solidago canadensis</i> | SOLD | goldenrod              | collected from the field:<br>42°47'51.8" N<br>72°58'23.2" W                                                                                                     | dug from the field and transplanted                                                                                    | June 9             | 30 |
| <i>Thymus vulgaris</i>     | THYG | thyme (German variety) | Lowes Home Improvement                                                                                                                                          | purchased from nursery and directly transplanted                                                                       | June 16            | 30 |
| <i>Verbascum thapsus</i>   | VER  | common mullein         | Pioneer Gardens or collected from the field:<br>42°44'52.1"N<br>72°47'30.5" W<br>and<br>42°24'51.03"N<br>72°30'30.77"W<br>and<br>42°28'45.53"N<br>72°34'46.06"W | purchased from nursery and directly transplanted; additional inflorescences were bagged and collected from field sites | June 10, 13 and 16 | 26 |
