# Supplementary material
Source: PubMed Central journal article supplement (PMC6212312)
Supplement: NIHMS987025-supplement-Supp_AppendixS2.pdf [file NIHMS987025-supplement-Supp_AppendixS2.pdf]

**Supporting Information.** Disease where you dine: Plant species and floral traits associated with pathogen transmission in bumble bees. Lynn S. Adler, Kristen M. Michaud, Stephen P. Ellner, Scott H. McArt, Philip C. Stevenson, and Rebecca E. Irwin. *Ecology*. 2018.

## **Appendix S2. Floral trait measurements**

The following images depict what we measured as corolla length and width for each species included in transmission trials. We provide these images because the choice of what to use for these traits wasn't always clear, particularly for species with highly zygomorphic flowers and Asteraceae species.

In all figures below, 'CL' indicates corolla length and 'CW' indicates corolla width. We also measured petal length and width on most species, indicated by 'PL' and 'PW' respectively, but ultimately did not include these measures in analyses because they were not relevant for all species.

Photo credits: Melissa Ha

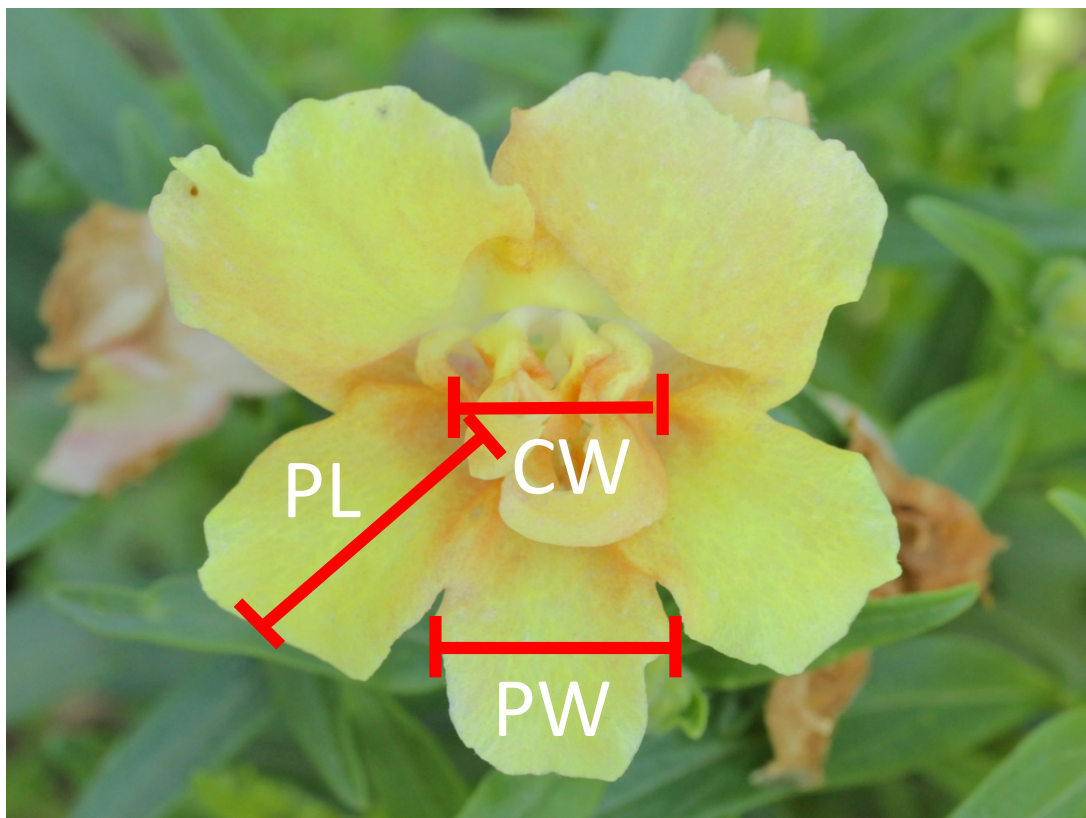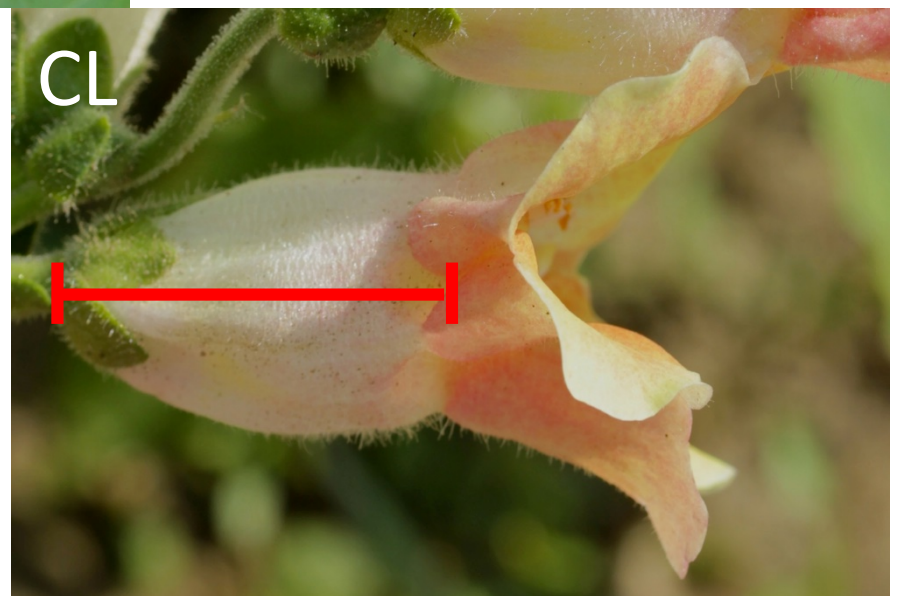

*Antirrhinum majus*

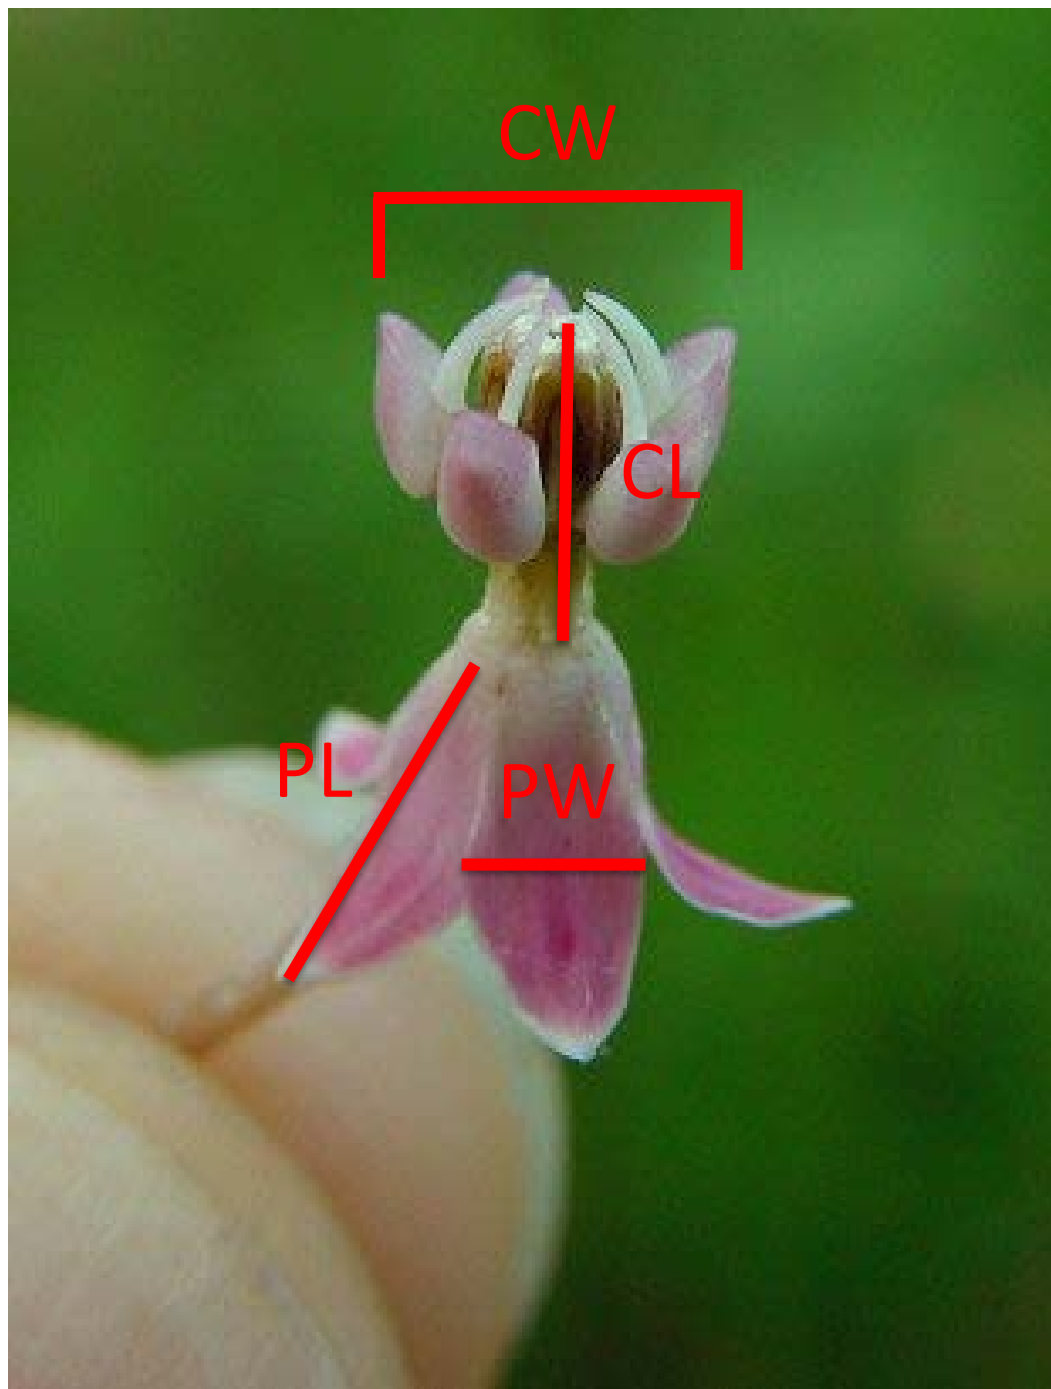

*Asclepias  
incarnata*

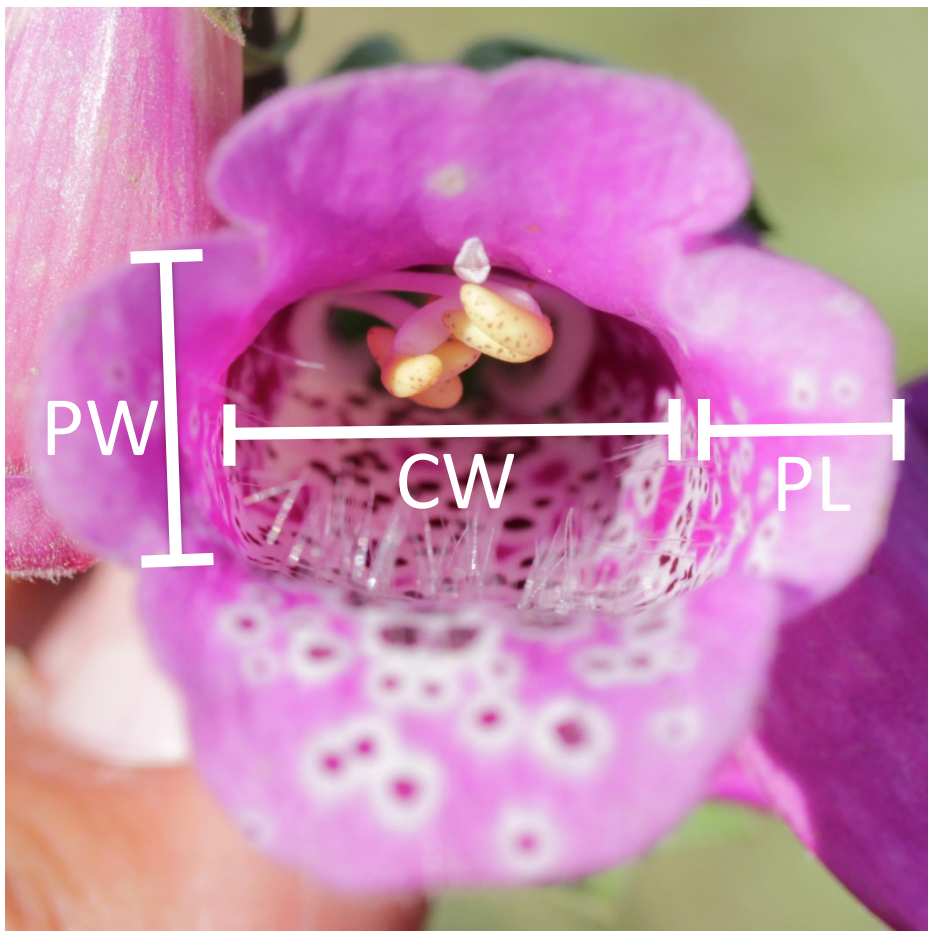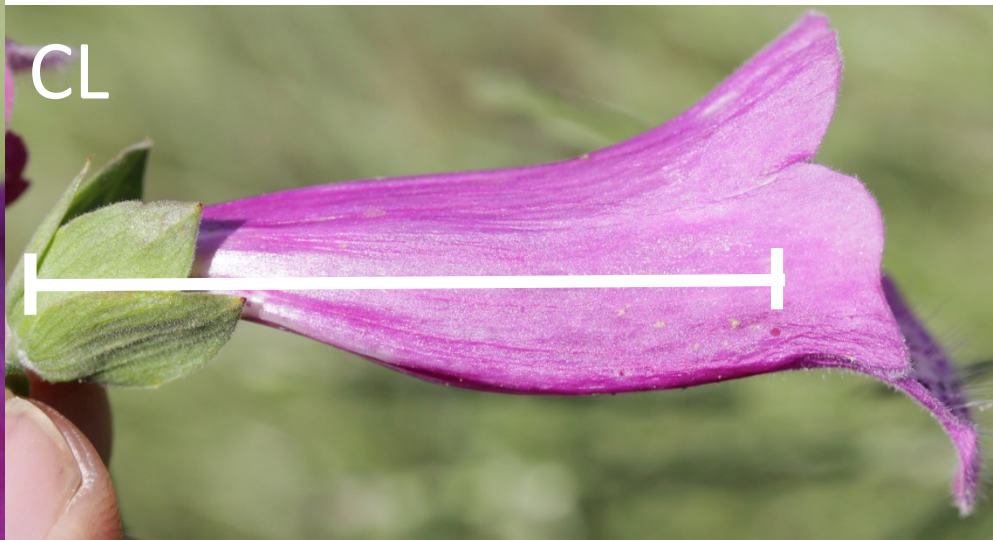

*Digitalis purpurea*

CW

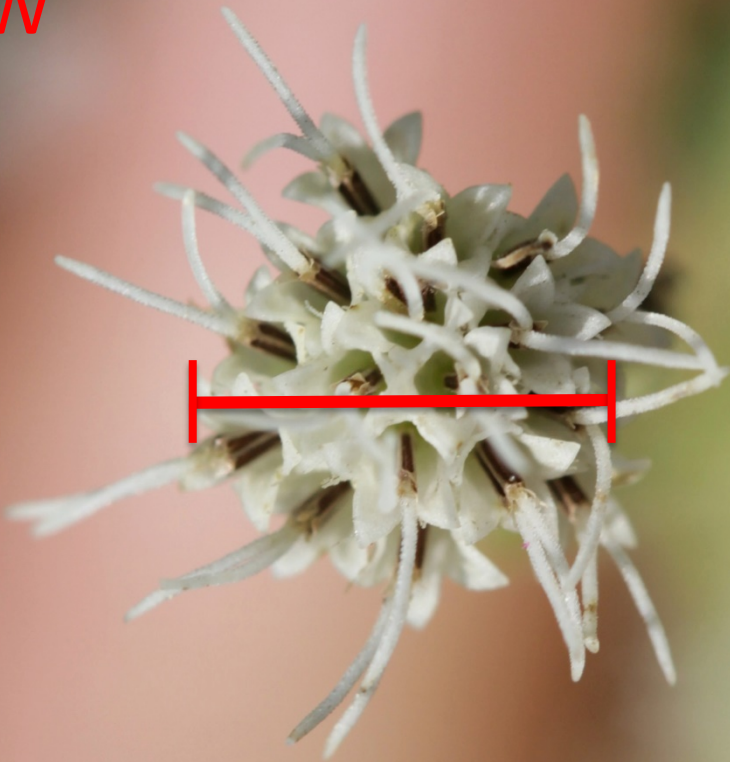

CL

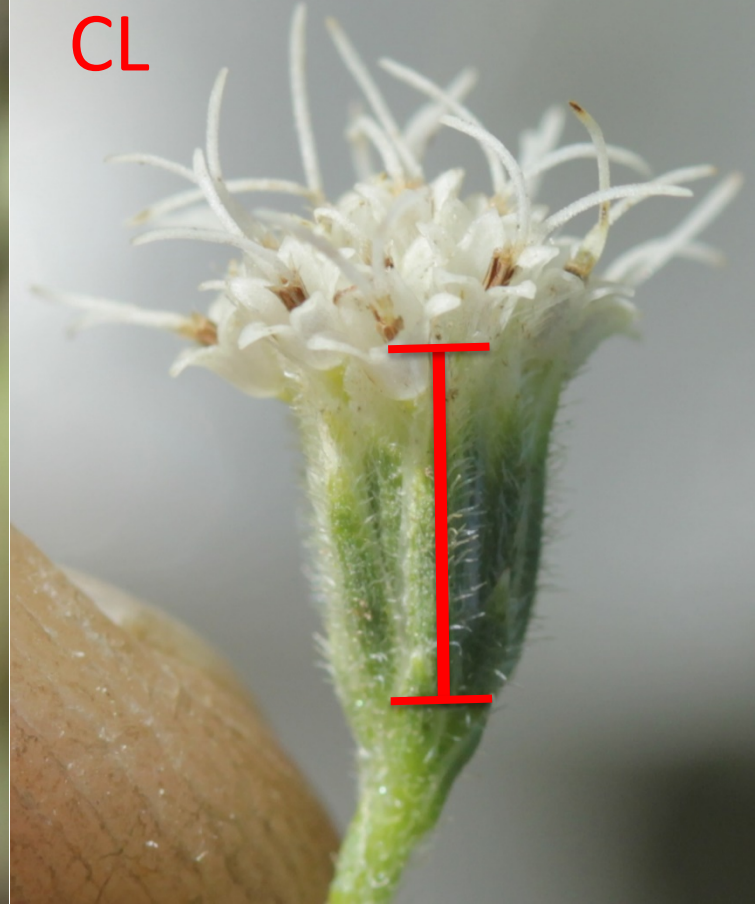

*Eupatorium perfoliatum*

DD (disk diameter)

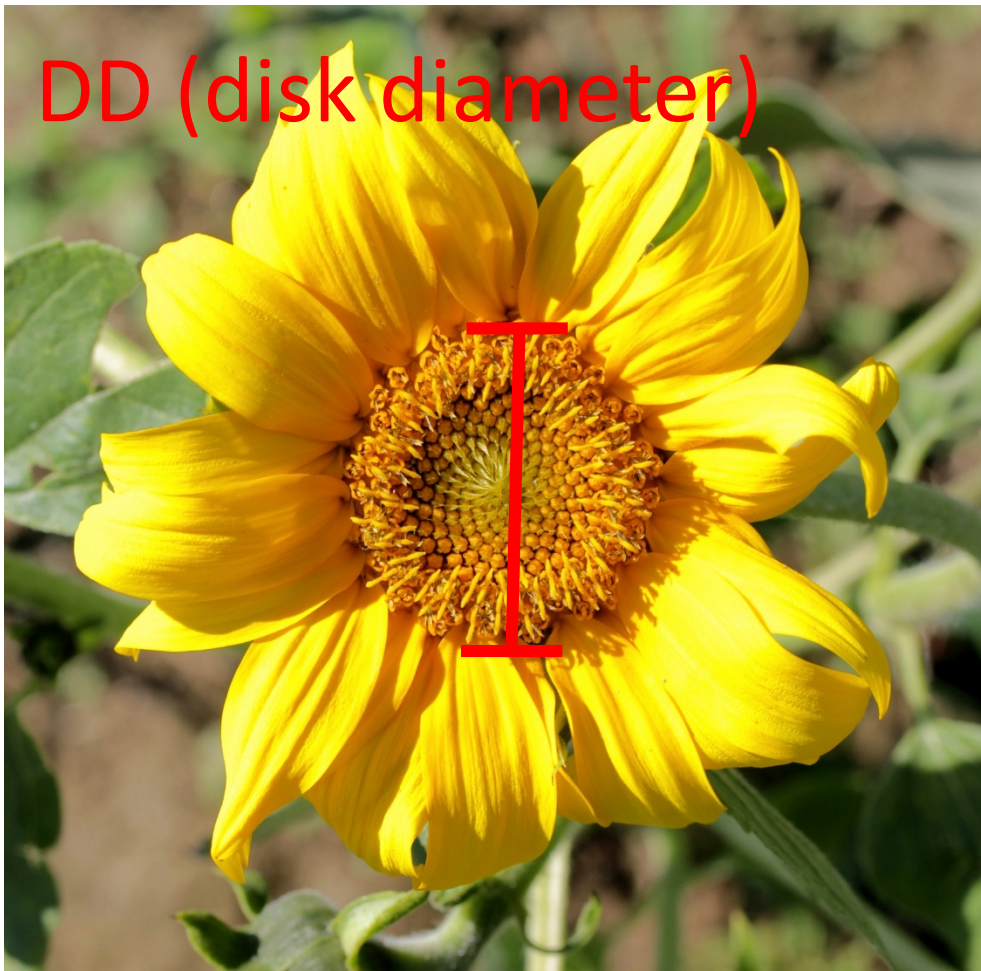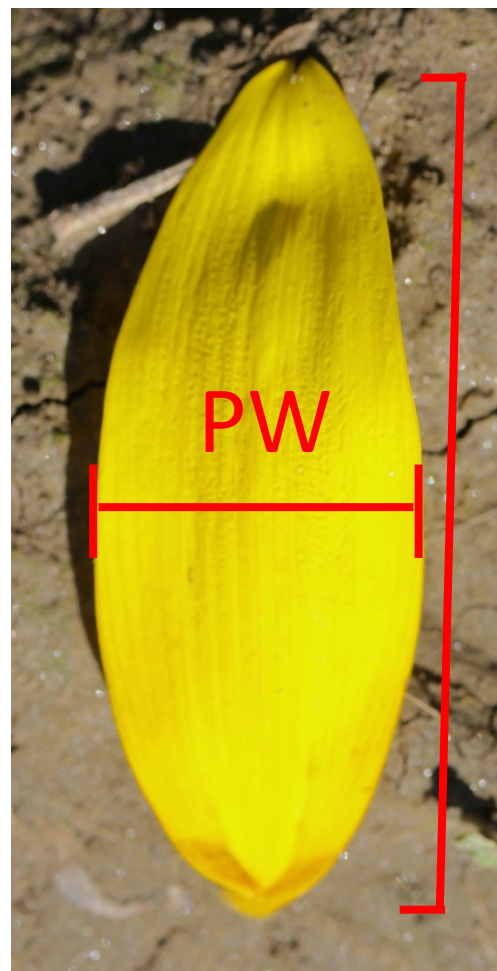

CW

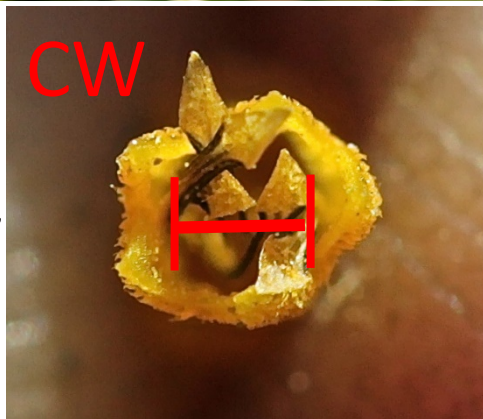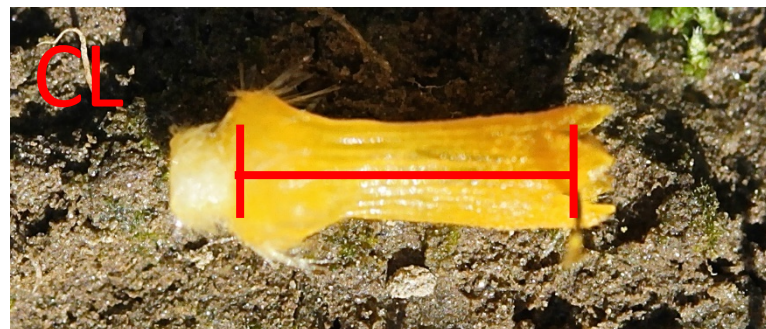

*Helianthus annuus*

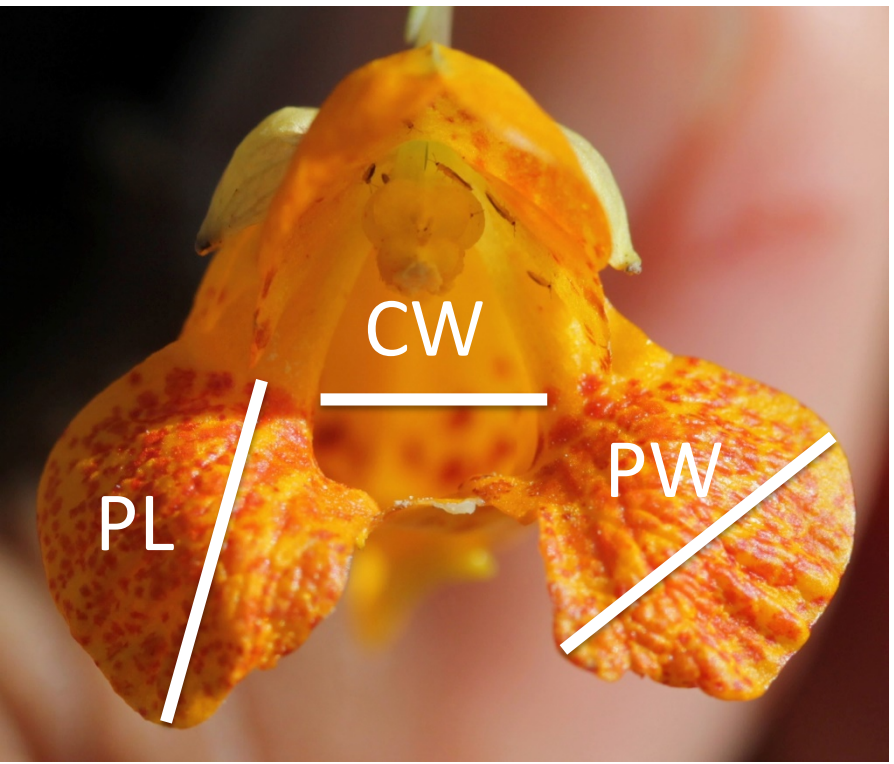

CL and CL2 were added to calculate final CL

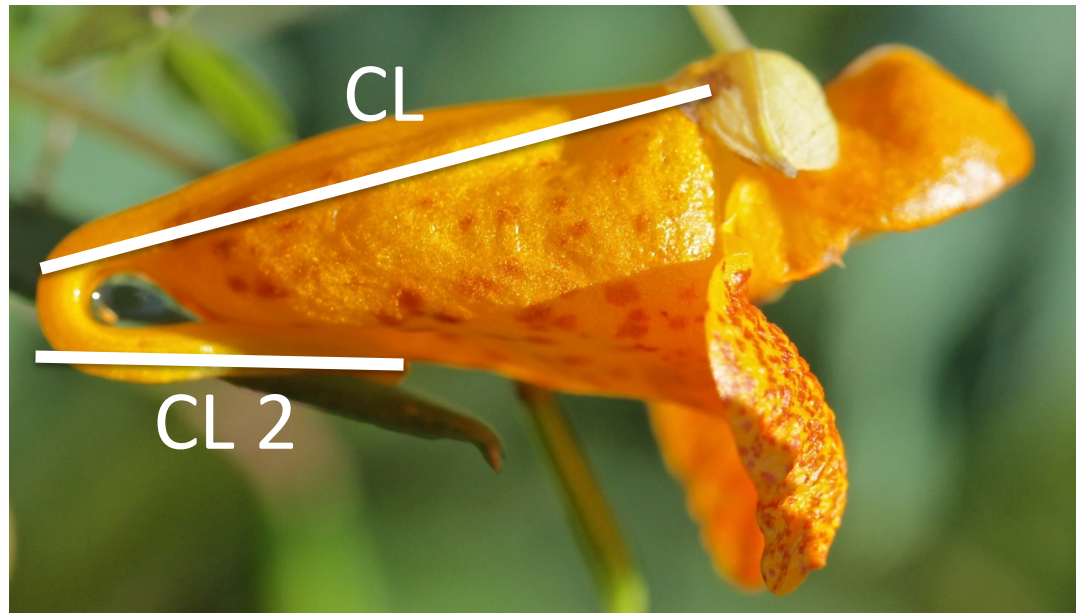

*Impatiens capensis*

CL and CL2  
were added  
to calculate  
final CL

*Linaria  
vulgaris*

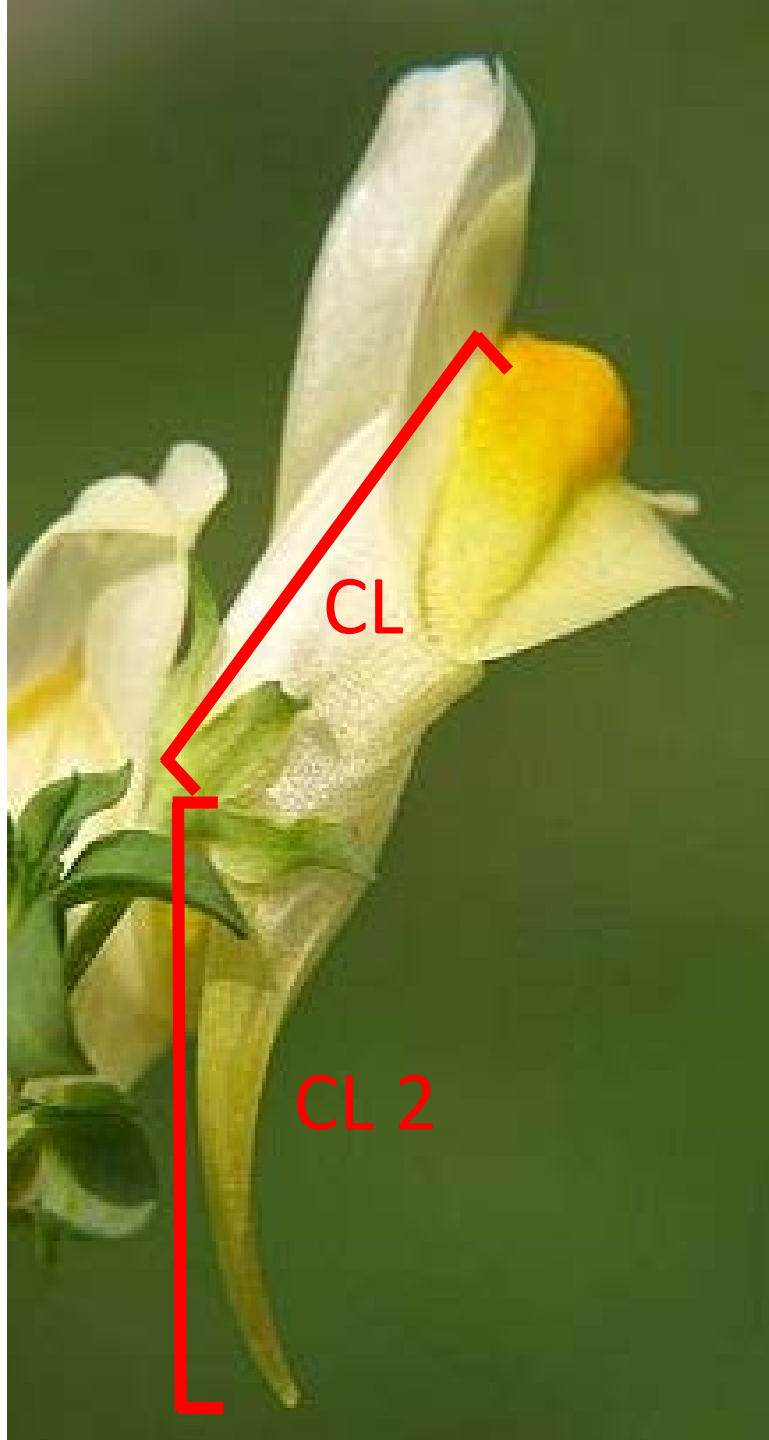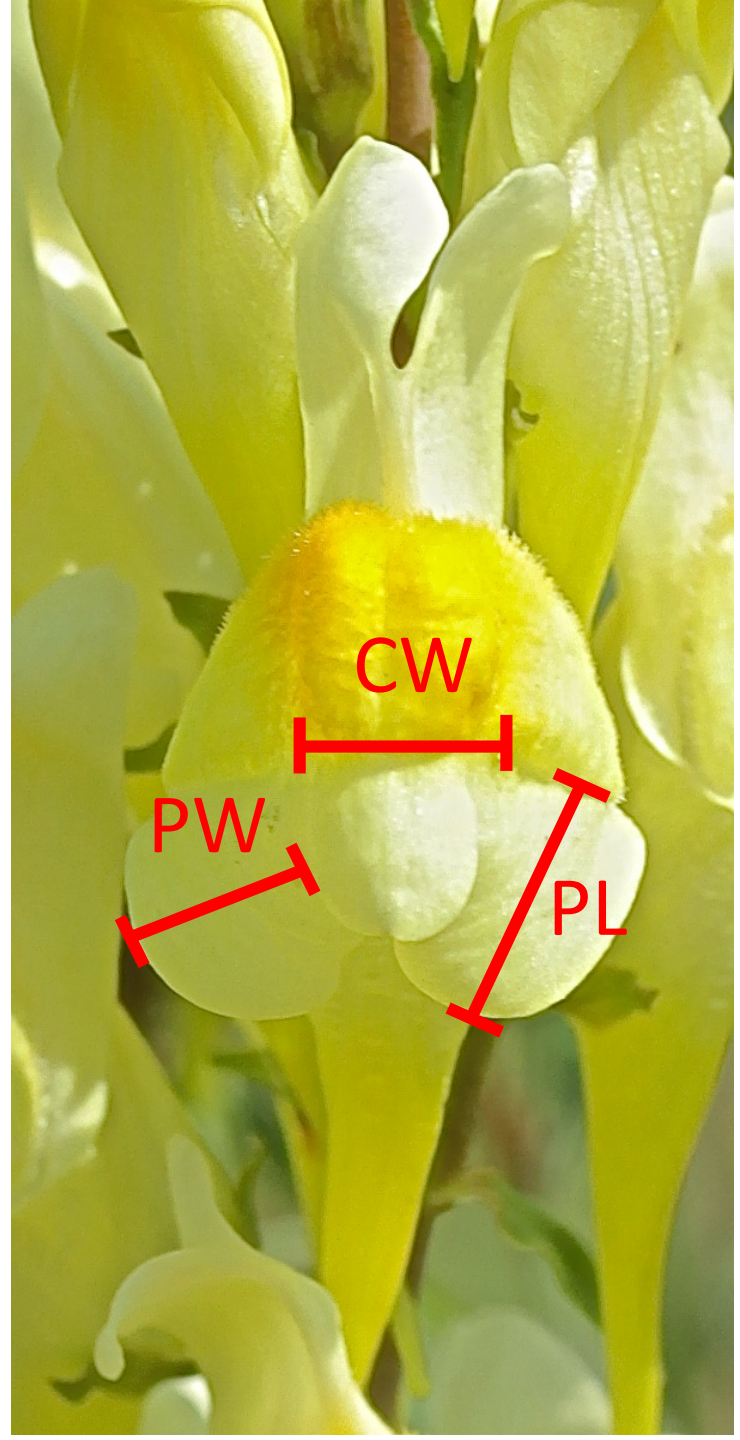



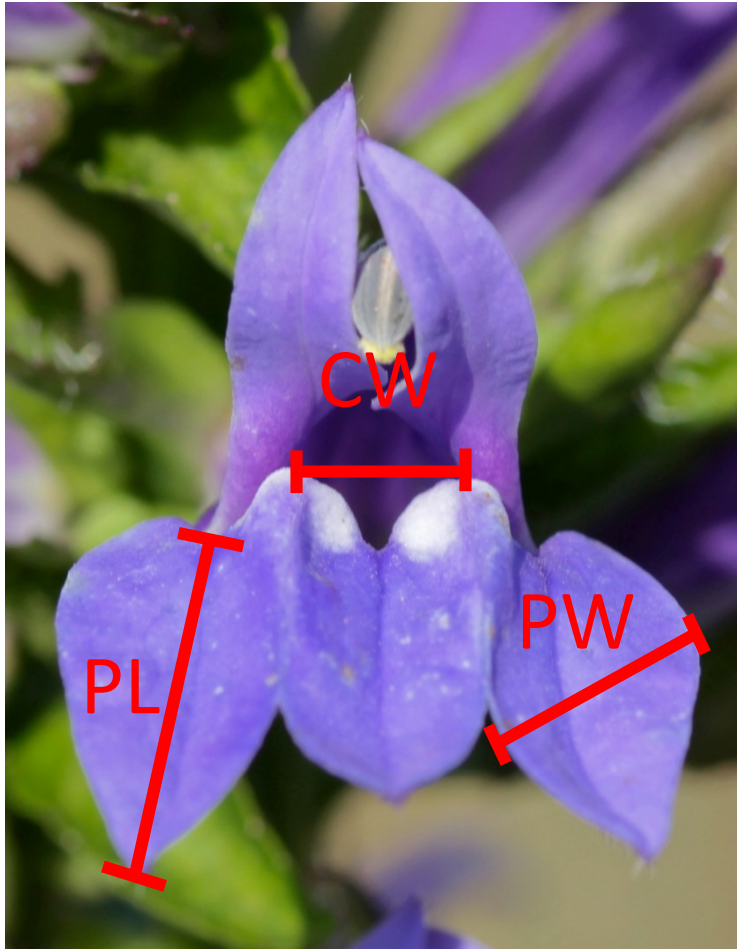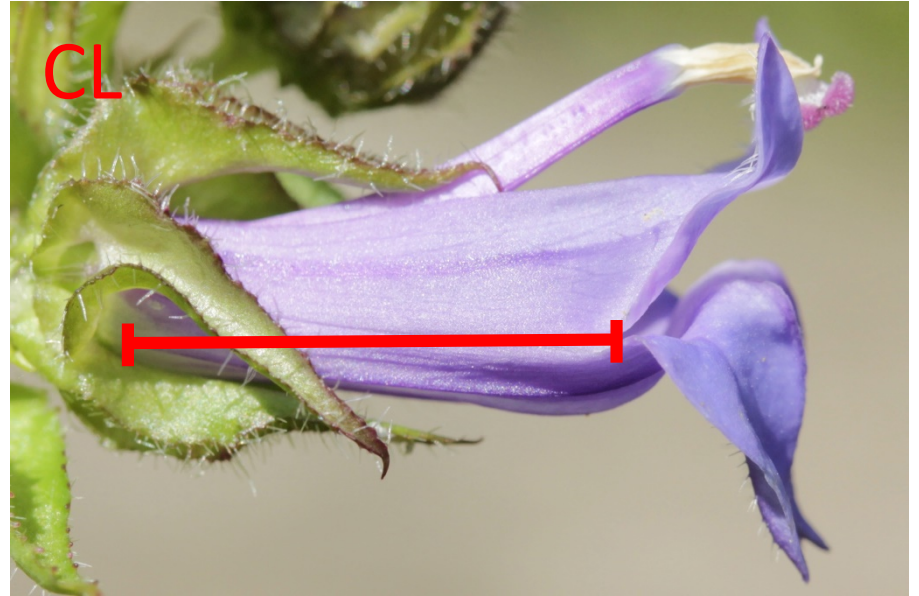

*Lobelia siphilitica*

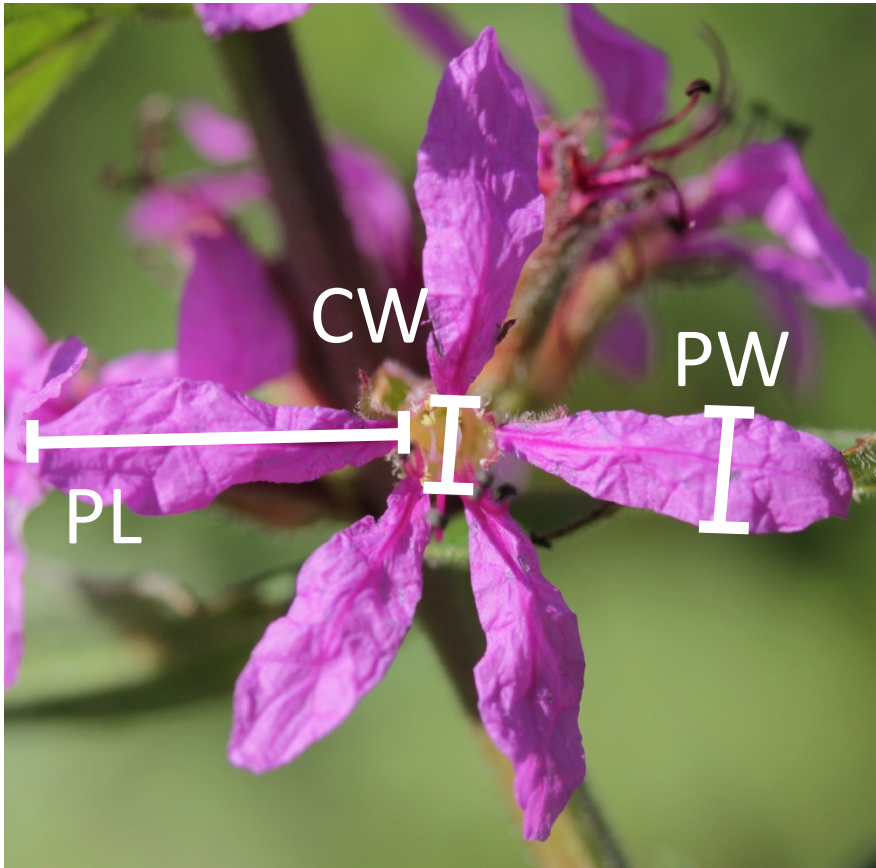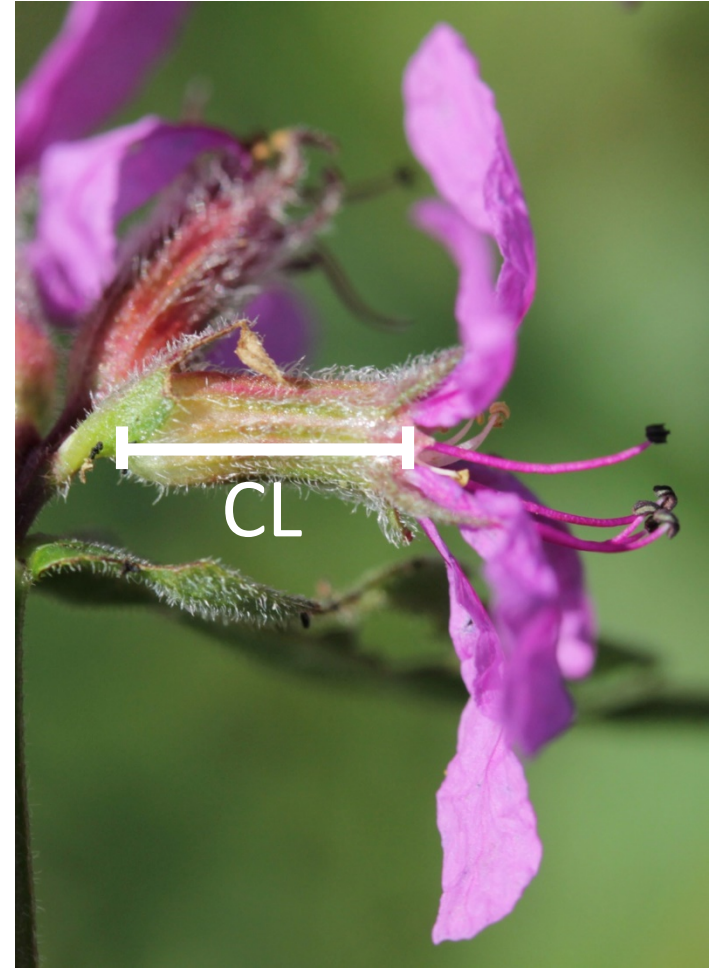

*Lythrum salicaria*

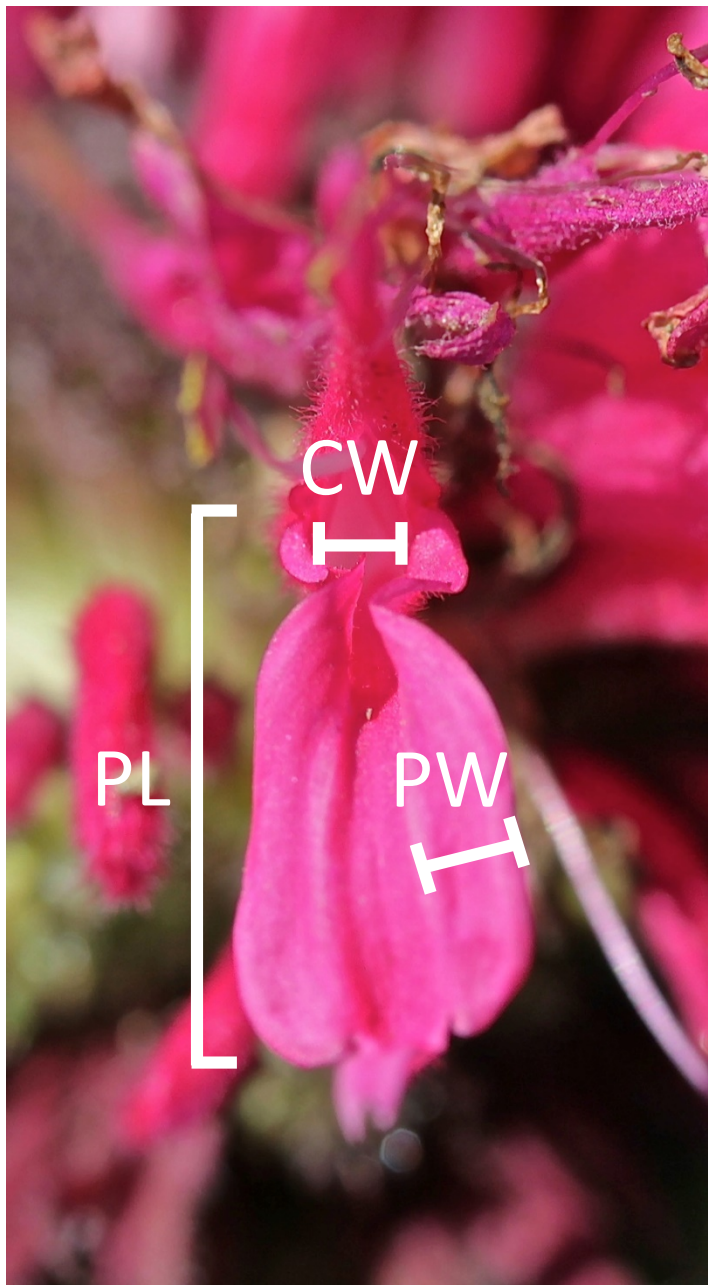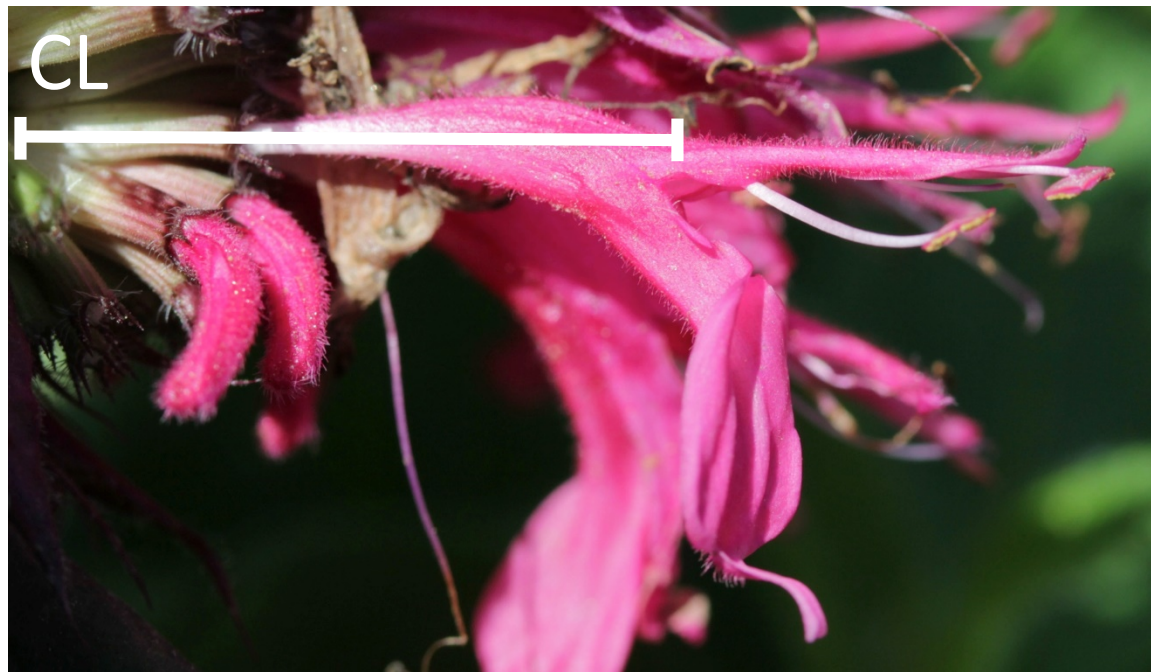

*Monarda didyma*

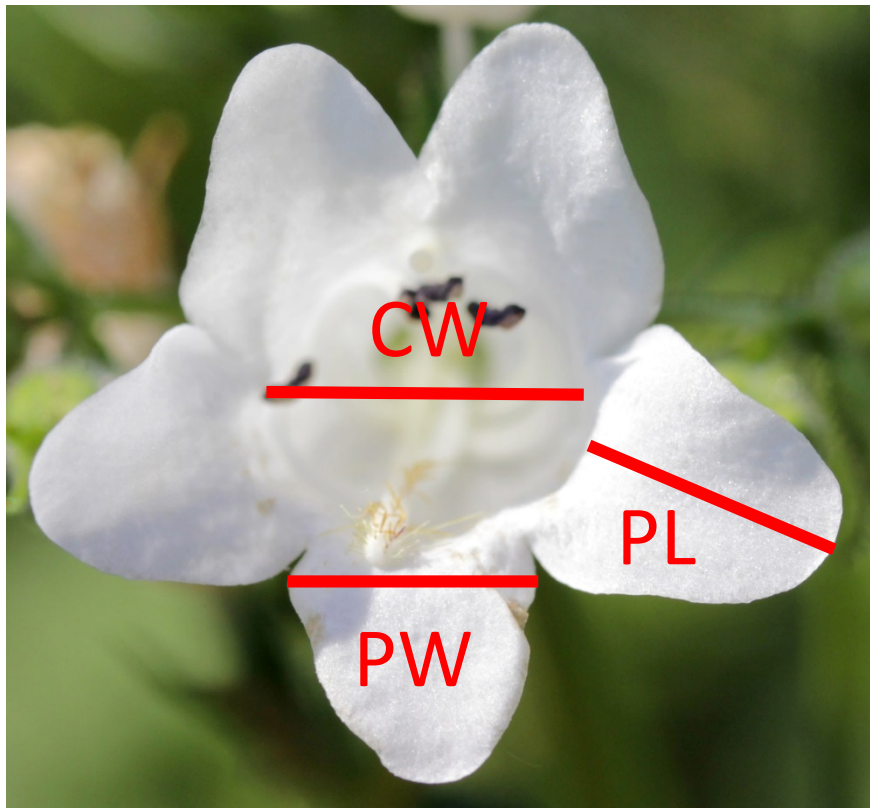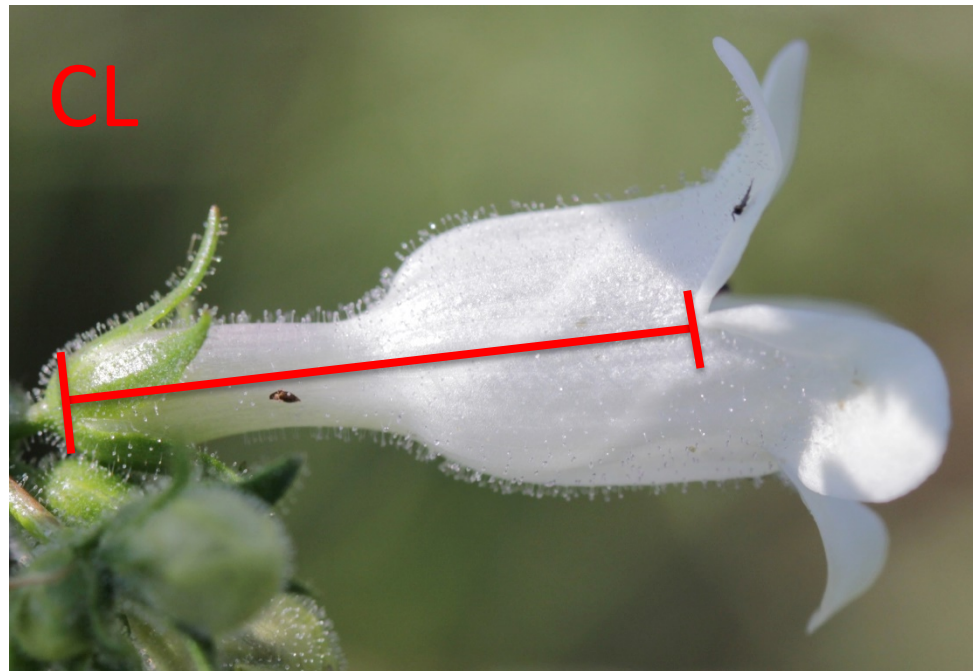

*Penstemon digitalis*

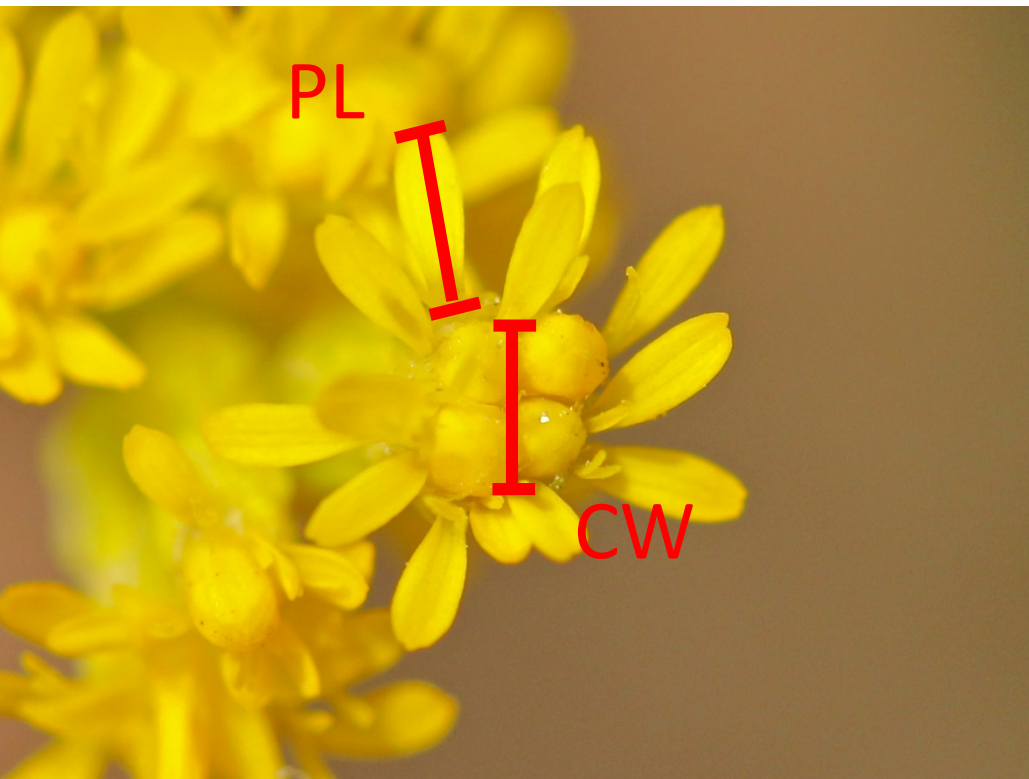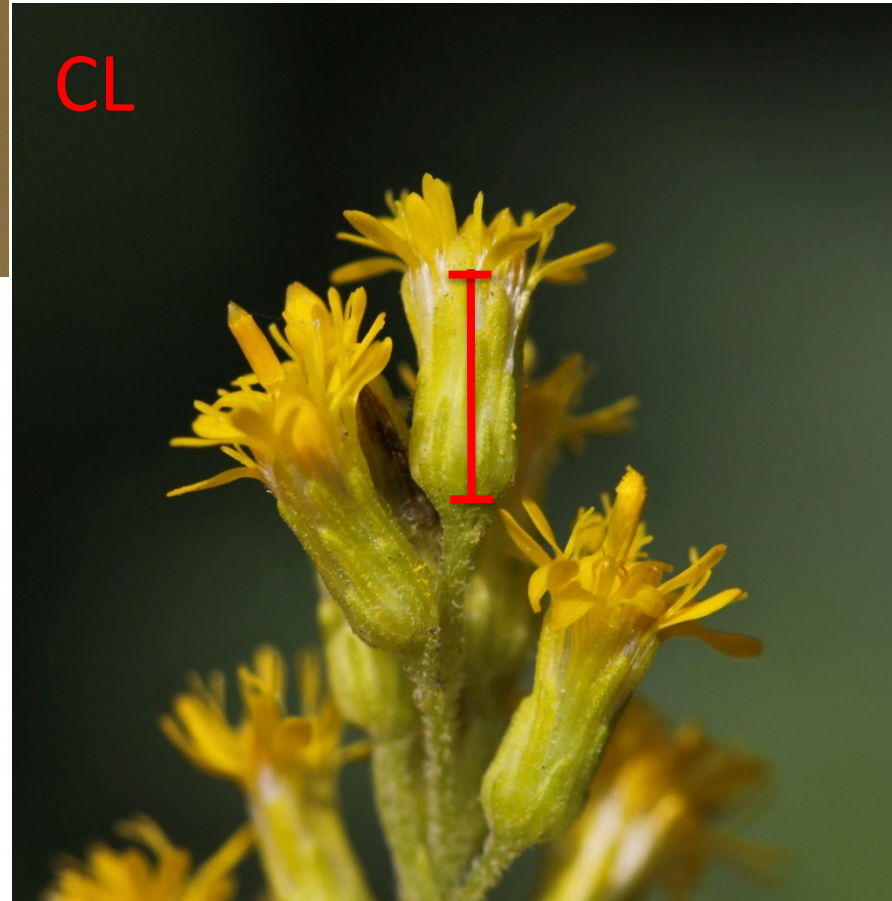

*Solidago canadensis*

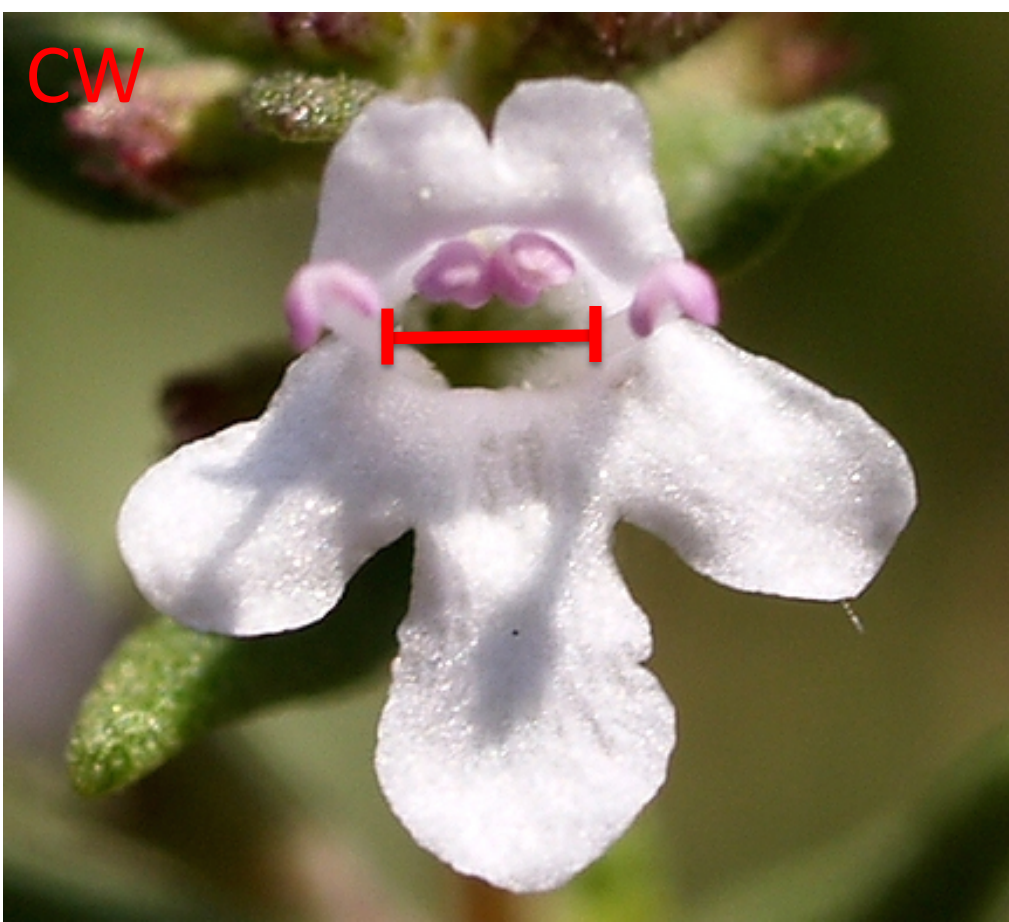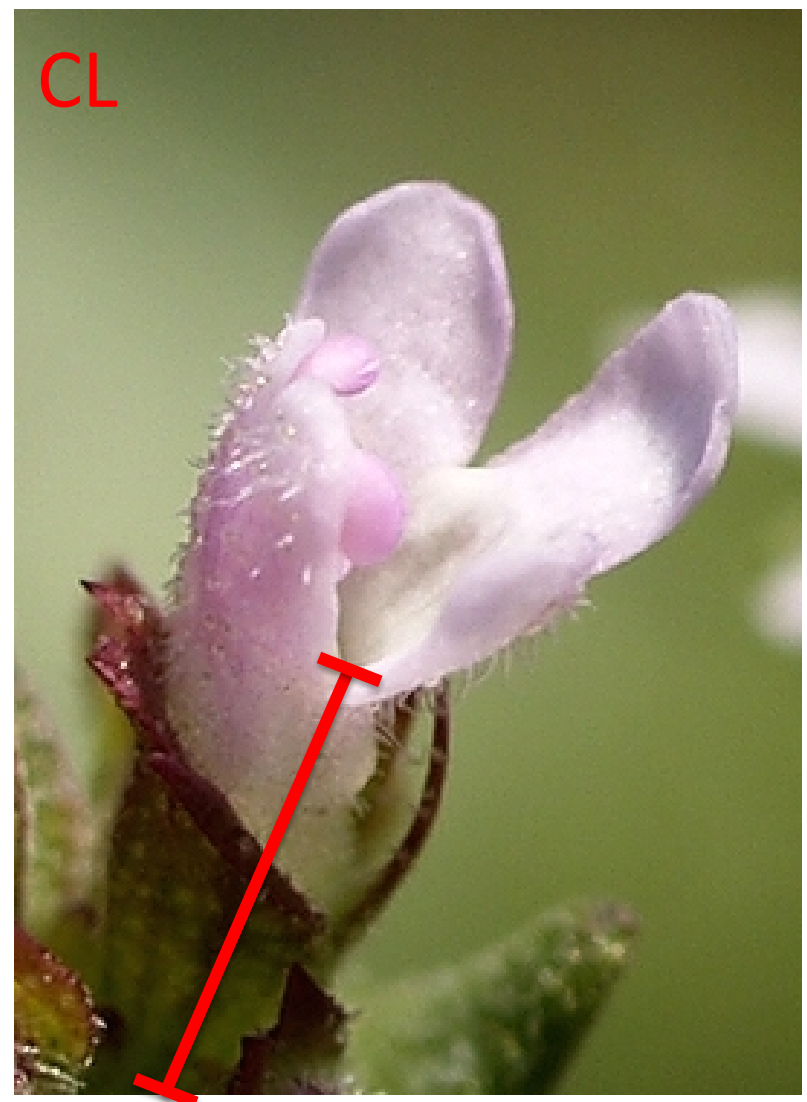

*Thymus vulgaris*

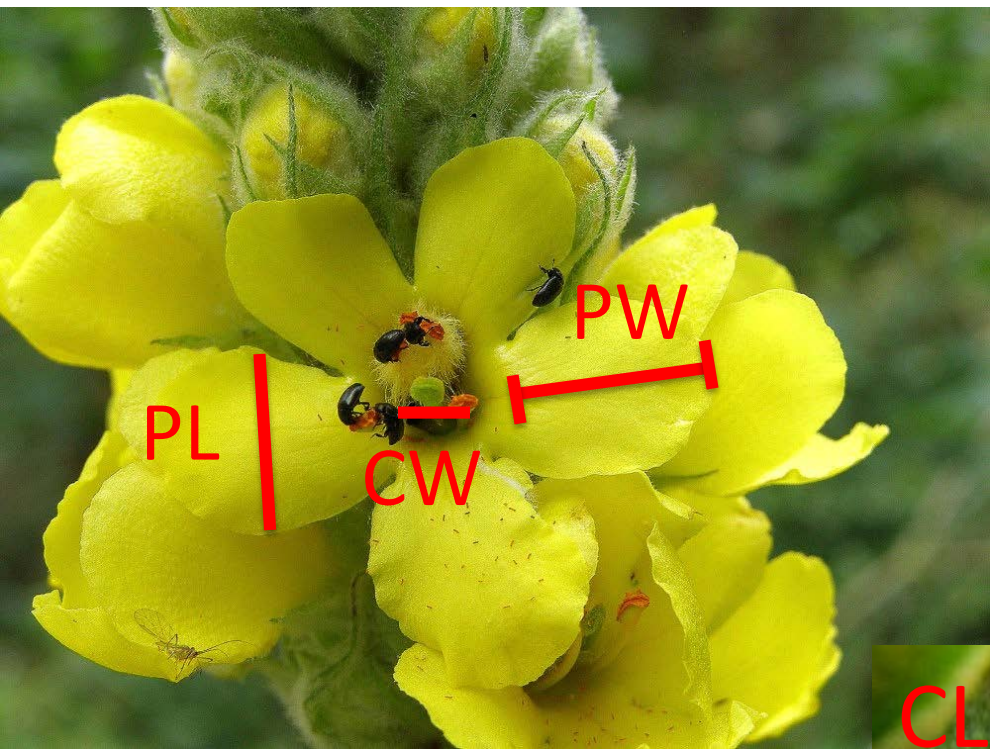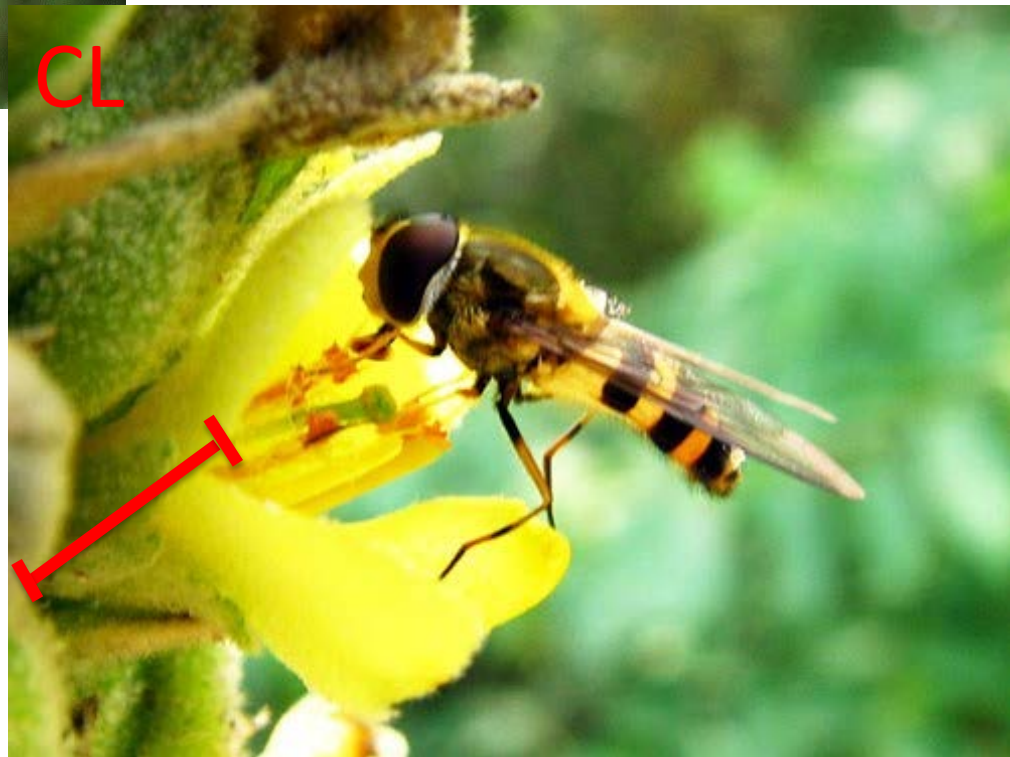

*Verbascum thapsus*
